# Supplementary material for: The rise and transformation of Bronze Age pastoralists in the Caucasus
Source: Springer Nature journal article supplement (doi:10.1038/s41586-024-08113-5), 2024-10-30
Supplement: 41586_2024_8113_MOESM3_ESM.pdf [file 41586_2024_8113_MOESM3_ESM.pdf]

## Supplementary Tables Guide

### Supplementary Table 1: General Information

Excel sheet containing general and context information of the individuals newly reported in this study and from Wang et. al. 2019.

### Supplementary Table 2: Report of shotgun screening

Excel sheet containing the EAGER report statistics for all individuals after initial shotgun screening.

### Supplementary Table 3: Relatedness sites

Excel sheet containing genetic relatedness results for all individuals from each site.

### Supplementary Table 4: Relatedness groups

Excel sheet containing genetic relatedness results for all individuals belonging to the same genetic grouping.

### Supplementary Table 5: Group Labels

Excel sheet containing context information about the published and modern individuals used in the analysis, as well as additional umbrella group labels for published individuals and groups used in this study.

### Supplementary Table 6: Cornerstone $f_4$ -statistics

Excel sheet containing results for  $f_4$ -statistics of the form  $f_4(\text{Mbuti}, \text{Test}; \text{Anatolia N/CHG}, X)$ , where  $X$  denotes CHG/EHG/Iran N and Anatolia N/EHG/Iran N respectively, and  $\text{Test}$  denotes various genetic groups from the *Caucasus* and *Steppe* clusters.

### Supplementary Table 7: MesoNeo $f_4$ -statistics

Excel sheet containing results of  $f_3$ - and  $f_4$ -statistics for genetic groups from the Mesolithic Neolithic transition period. The Z-scores of the threshold  $|Z| \geq 2$  and  $|Z| \geq 3$  are highlighted in blue and green respectively. The  $f_4$ -statistics with low SNP overlap among the tested groups are highlighted in yellow.

### Supplementary Table 8: MesoNeo qpAdm

Excel sheet containing results for qpAdm modelling of genetic groups from the Mesolithic Neolithic transition period. Highlighted rows in green represent feasible qpAdm models, red highlights represent infeasible qpAdm models with the reasoning mentioned in the Notes column. Yellow highlighted rows indicate the low SNP overlap among the tested groups in that qpAdm model or an elevated Z-score. The models in bold are shown in the plots.

### Supplementary Table 9: Eneolithic 5<sup>th</sup> $f_4$ -statistics

Excel sheet containing results for  $f_3$ - and  $f_4$ -statistics for genetic groups from the Eneolithic (5<sup>th</sup> millennium BC) period.

### Supplementary Table 10: Eneolithic 5<sup>th</sup> qpAdm

Excel sheet containing results for qpAdm modelling of genetic groups from the Eneolithic (5<sup>th</sup> millennium BC) period.

### Supplementary Table 11: DATES

Excel sheet containing estimates for admixture dates for Neolithic, Eneolithic and EBA genetic groups as well as the ancient individuals included in the respective sources.

**Supplementary Table 12: Eneolithic 4<sup>th</sup>  $f_4$ -statistics**

Excel sheet containing results for  $f_4$ -statistics for genetic groups from the Eneolithic (4<sup>th</sup> millennium BC) period.

**Supplementary Table 13: Eneolithic 4<sup>th</sup> qpAdm**

Excel sheet containing results for qpAdm modelling of genetic groups from the Eneolithic (4<sup>th</sup> millennium BC) period.

**Supplementary Table 14: EMBA 3<sup>rd</sup>  $f_4$ -statistics**

Excel sheet containing results for  $f_3$ - and  $f_4$ -statistics for genetic groups from the Early to Middle Bronze Age (3<sup>rd</sup> millennium BC) period.

**Supplementary Table 15: EMBA 3<sup>rd</sup> qpAdm**

Excel sheet containing results for qpAdm modelling of genetic groups from the Early to Middle Bronze Age (3<sup>rd</sup> millennium BC) period.

**Supplementary Table 16: MLBA 2<sup>nd</sup>  $f_4$ -statistics**

Excel sheet containing results for  $f_4$ -statistics for genetic groups from the Middle to Late Bronze Age (2<sup>nd</sup> millennium BC) period.

**Supplementary Table 17: MLBA 2<sup>nd</sup> qpAdm**

Excel sheet containing results for qpAdm modelling of genetic groups from the Middle to Late Bronze Age (2<sup>nd</sup> millennium BC) period.

**Supplementary Table 18: IBD analysis**

Excel sheet summarizing the results of IBD sharing from ancIBD, reporting both number and total length of IBD tracts longer than 8, 12, 16 and 20 cM, as well as longest IBD block. We also report genotype probabilities (GP) of imputed individuals.

**Supplementary Table 19: ROH analysis**

Excel sheet containing the results of estimated runs of homozygosity (ROH) for all individuals having more than 400,000 SNPs covered on the 1240k SNP panel (n=X) using the hapROH software.

**Supplementary Table 20: PCA populations**

Excel sheet containing the list of populations used in the West Eurasian and extended West Eurasian PCAs.
